# Supplementary material for: Chemotherapy resistance due to epithelial-to-mesenchymal transition is caused by abnormal lipid metabolic balance
Source: eLife journal article supplement (doi:10.7554/elife.104374), 2024-12-18

Figure 1B ABCA1

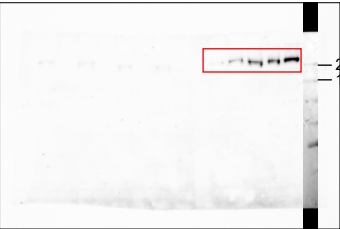

Figure 1B Snail

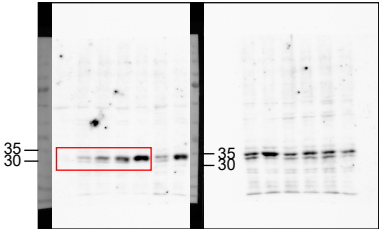

Figure 1B  $\alpha$ -Tubulin

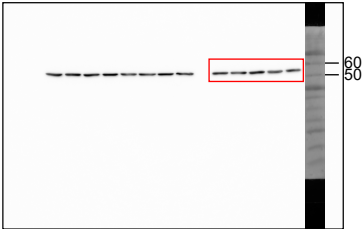

Figure 1L ABCA1

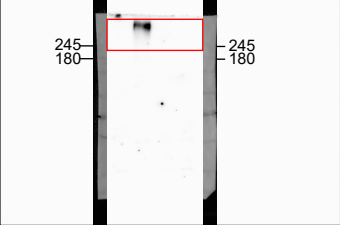

Figure 1L Snail

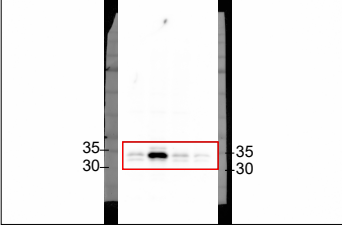

Figure 1L E-cadherin

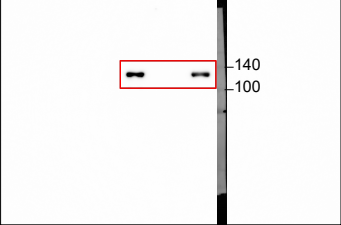

Figure 1L  $\alpha$ -Tubulin

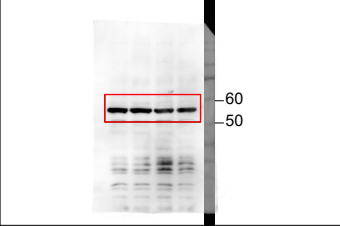

Figure 1N ABCA1

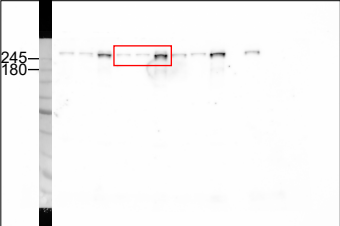

Figure 1N Snail

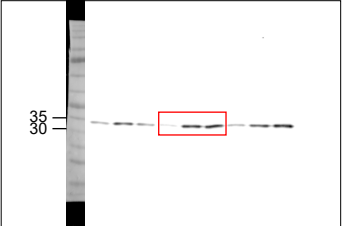

Figure 1N  $\alpha$ -tubulin

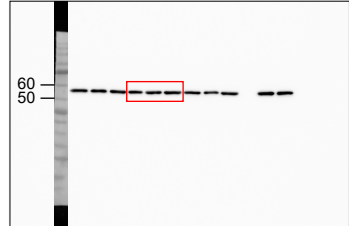

Figure 1O ABCA1

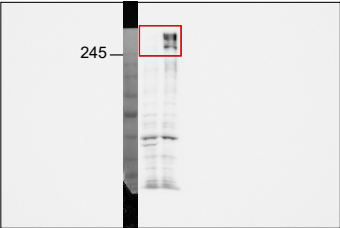

Figure 1O Snail

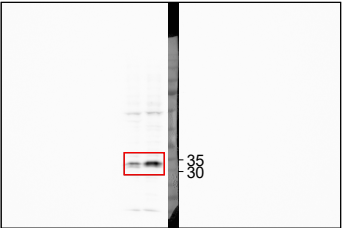

Figure 1O  $\alpha$ -tubulin

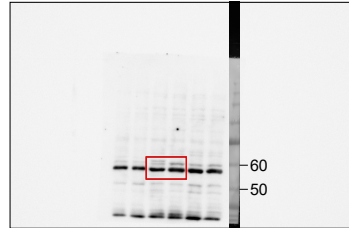

Supplement: fig1-data2 [file elife-104374-fig1-data2-v1.pdf]
