# Supplementary material for: Chemotherapy resistance due to epithelial-to-mesenchymal transition is caused by abnormal lipid metabolic balance
Source: eLife journal article supplement (doi:10.7554/elife.104374), 2024-12-18

Figure 2B ABCA1

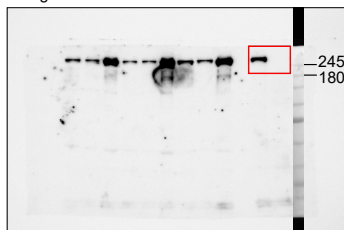

Figure 2B  $\alpha$ -tubulin

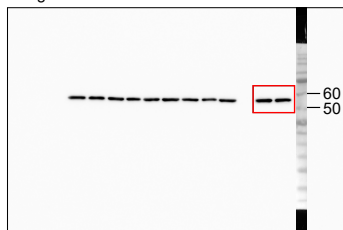

Figure 2D ABCA1

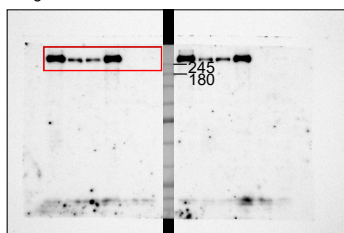

Figure 2D  $\alpha$ -tubulin

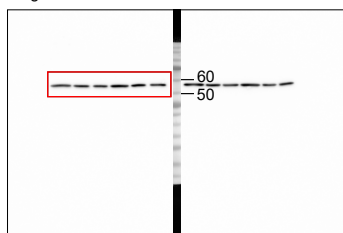

Figure 2 - figure supplement 1A ABCA1

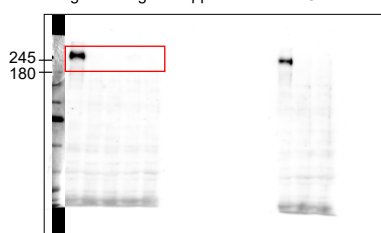

Figure 2 - figure supplement 1A p-FOXO3a

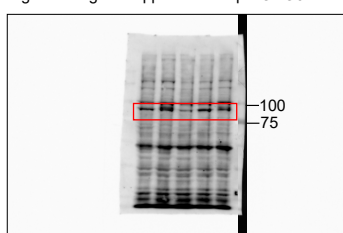

Figure 2 - figure supplement 1A p-Akt

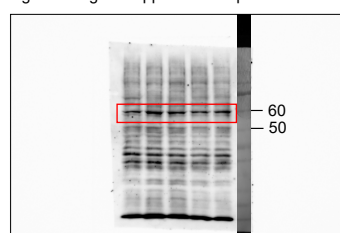

Figure 2 - figure supplement 1A Akt

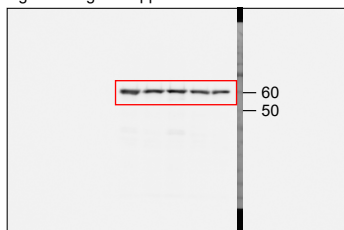

Figure 2 - figure supplement 1A  $\alpha$ -tubulin

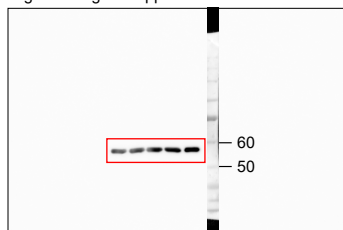

Figure 2 - figure supplement 1B c-myc

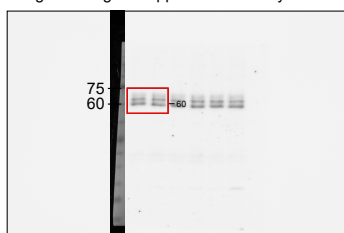

Figure 2 - figure supplement 1B  $\alpha$ -tubulin

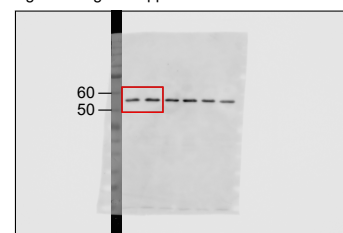

Figure 2 - figure supplement 2A ABCA1

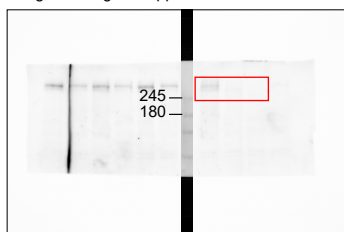

Figure 2 - figure supplement 2A  $\alpha$ -tubulin

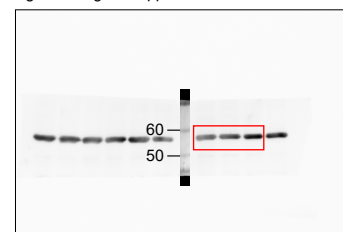

Supplement: fig2-data2 [file elife-104374-fig2-data2-v1.pdf]
