# Supplementary material for: Chemotherapy resistance due to epithelial-to-mesenchymal transition is caused by abnormal lipid metabolic balance
Source: eLife journal article supplement (doi:10.7554/elife.104374), 2024-12-18

Figure 3F *ELOVL*

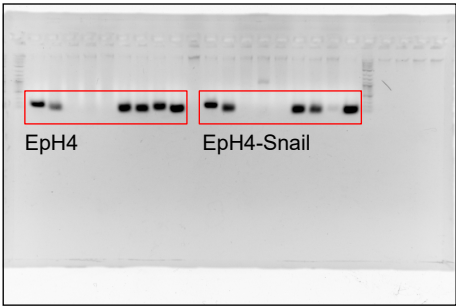

Figure 3F *CERS*

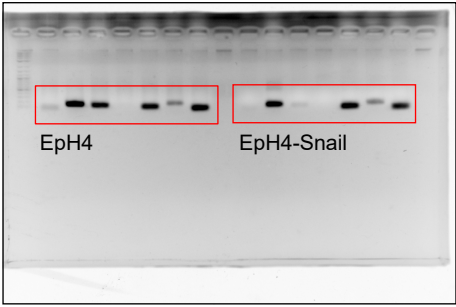

Figure 3H ABCA1

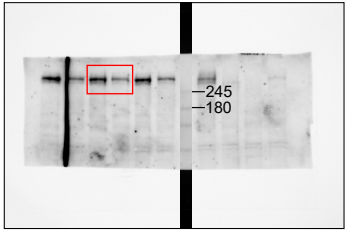

Figure 3H  $\alpha$ -tubulin

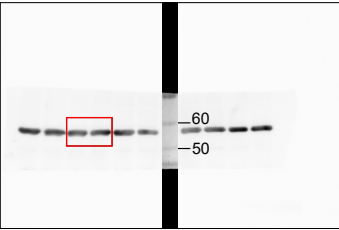

Figure 3I ABCA1

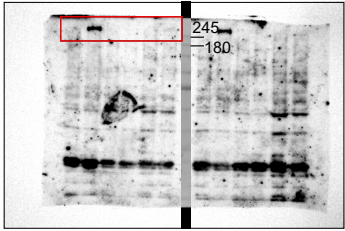

Figure 3I Snail

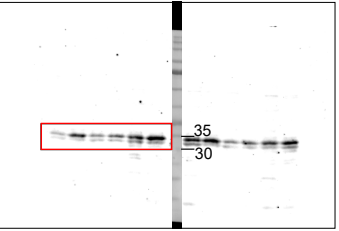

Figure 3I  $\alpha$ -tubulin

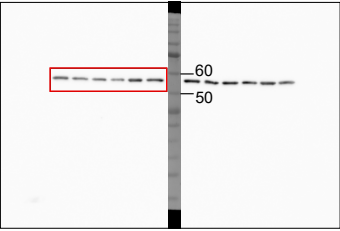

Supplement: fig3-data2 [file elife-104374-fig3-data2-v1.pdf]
